# Supplementary material for: Extramedullary multiple myeloma patient-derived orthotopic xenograft with a highly altered genome: combined molecular and therapeutic studies
Source: PubMed Central journal article supplement (PMC8325009; doi:10.1242/dmm.048223), 2021-07-15
Supplement: dmm-14-048223-s1.pdf [file dmm-14-048223-s1.pdf]

# FIGURE S1

**A.**

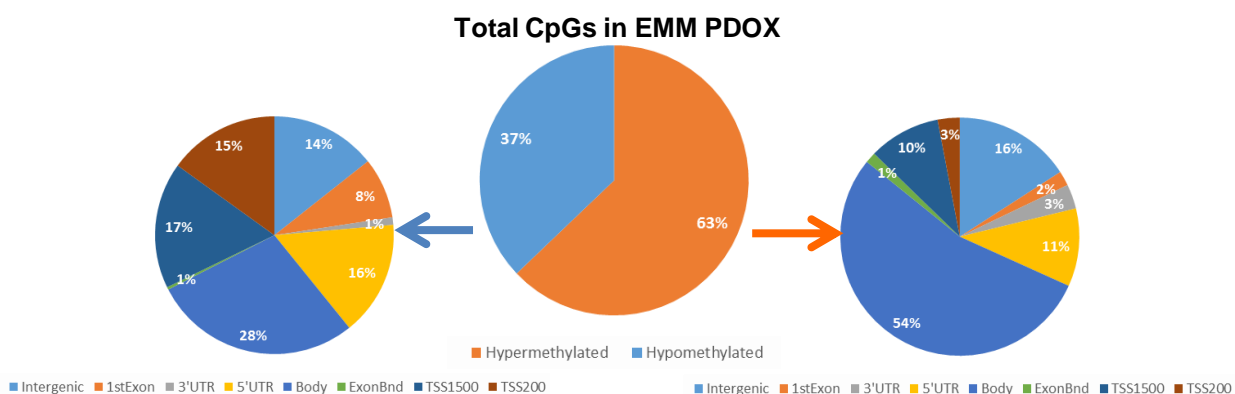

**B.**

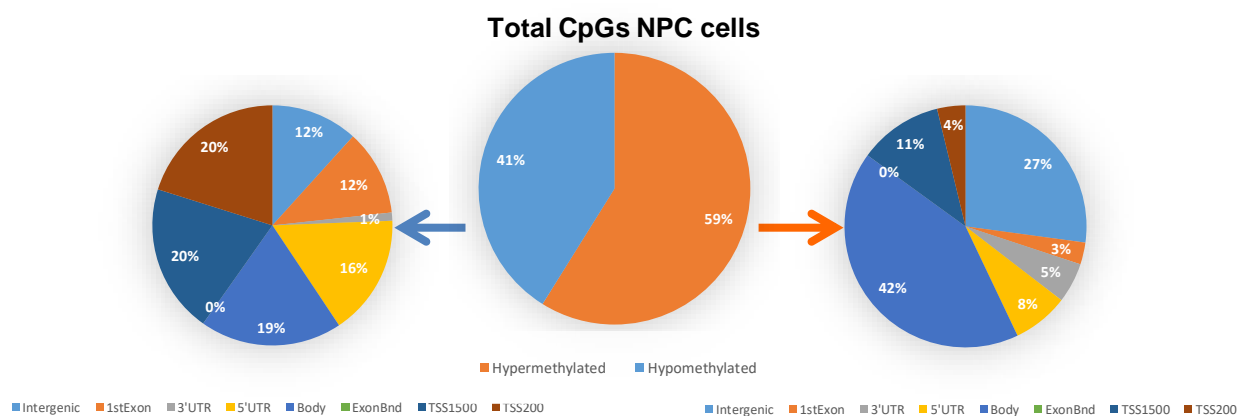

**C.**

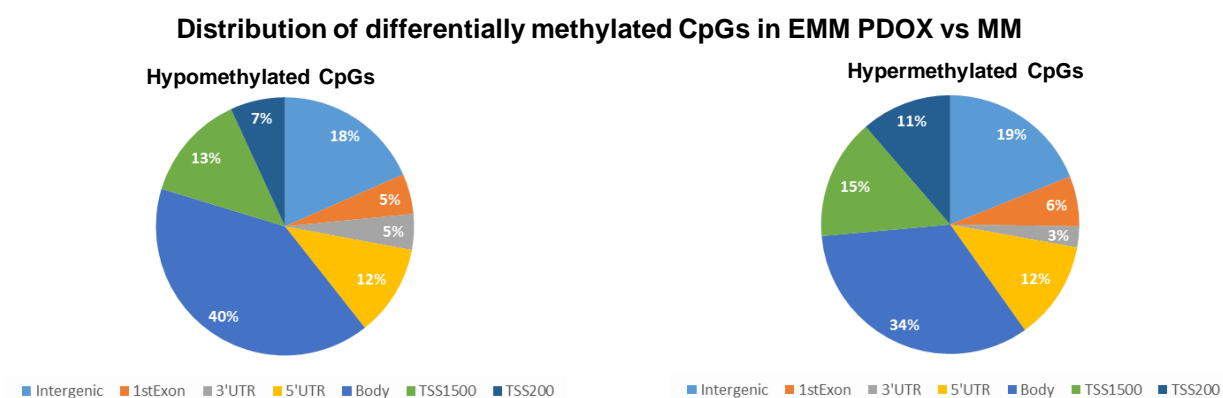

**Figure S1. Distribution of hypermethylated and hypomethylated CpGs by genome functional regions.** (A) Percentage of total hypermethylated and hypomethylated CpGs in EMM PDOX and their distribution by genome functional regions (hypermethylated CpGs (left panel) and hypomethylated CpGs (right panel)). (B) Percentage of total hypermethylated and hypomethylated CpGs in NPC and their distribution by genome functional regions (hypermethylated CpGs (left panel) and hypomethylated CpGs (right panel)). (C) Distribution of differentially methylated CpGs between EMM PDOX and 101 newly diagnosed MM cases (hypermethylated CpGs (left panel) and hypomethylated CpGs (right panel)). NPC and MM cases and data were previously reported in Agirre et al., 2015.

Table S1

[Click here to download Table S1](#)

Table S2

[Click here to download Table S2](#)

Table S3

[Click here to download Table S3](#)
